# Supplementary material for: Limited Sensitivity of Circulating Tumor DNA Detection by Droplet Digital PCR in Non-Metastatic Operable Gastric Cancer Patients
Source: PubMed Central journal article supplement (PMC6468548; doi:10.3390/cancers11030396), 2019-03-21
Supplement: cancers-11-00396-s001.pdf [file cancers-11-00396-s001.pdf]

# Supplementary Materials: Limited sensitivity of circulating tumor DNA detection by droplet digital PCR in non-metastatic operable gastric cancer patients

Luc Cabel, Charles Decraene, Ivan Bieche, Jean-Yves Pierga, Mostefa Bennamoun, David Fuks, Jean-Marc Ferraz, Marine Lefevre, Sylvain Baulande, Virginie Bernard, Sophie Vacher, Pascale Mariani, Charlotte Proudhon, Francois-Clement Bidard and Christophe Louvet

**Table S1.** Targeted NGS panel genes.

| <b>Targeted NGS Panel Genes</b> |               |               |
|---------------------------------|---------------|---------------|
| <b>39 Genes</b>                 |               |               |
| <i>AKT1</i>                     | <i>HRAS</i>   | <i>NOTCH2</i> |
| <i>ALK</i>                      | <i>KDR</i>    | <i>NOTCH4</i> |
| <i>BRAF</i>                     | <i>KEAP1</i>  | <i>NRAS</i>   |
| <i>BRCA1</i>                    | <i>KIT</i>    | <i>PDGFRA</i> |
| <i>BRCA2</i>                    | <i>KRAS</i>   | <i>PIK3CA</i> |
| <i>CTNNB1</i>                   | <i>MAP2K1</i> | <i>PTEN</i>   |
| <i>EGFR</i>                     | <i>MAP2K4</i> | <i>PTPN11</i> |
| <i>ERBB2</i>                    | <i>MAP3K1</i> | <i>RET</i>    |
| <i>ERBB3</i>                    | <i>MET</i>    | <i>STK11</i>  |
| <i>FBXW7</i>                    | <i>MTOR</i>   | <i>TP53</i>   |
| <i>FGFR1</i>                    | <i>NF1</i>    | <i>TSC1</i>   |
| <i>FGFR2</i>                    | <i>NFE2L2</i> | <i>TSC2</i>   |
| <i>FGFR3</i>                    | <i>NOTCH1</i> | <i>VHL</i>    |
